# Supplementary material
Source: publisher figshare collection journal article supplement (https://future-science-group.figshare.com/ndownloader/files/32904482)
Supplement: Supplementary file 1 [file 32904482]

**Supplemental Table 2: Average Participant Responses to Questions Assessing Ethics of PGx Testing on a Scale of 1 (Strongly Disagree) to 5 (Strongly Agree)**

|  | Average Score |
| --- | --- |
| It is important that my health care provider tells me about these pharmacogenetic tests, before any of them are done. | 4.3 ± 0.8 |
| If these pharmacogenetic tests were part of my usual blood work it is important that my health care provider seek separate approval from me, specifically for the pharmacogenetic tests. | 4.0 ± 1.0 |
| If I had to pay for the pharmacogenetic tests myself, financial costs would be one of my concerns about taking these tests. | 4.2 ± 0.9 |
| If I took the test, I would be concerned about that insurance companies may use the pharmacogenetic test results to deny healthcare coverage. | 4.0 ± 1.1 |
| If I took the test, I would be concerned about the effect of the pharmacogenetic test results on my employment opportunities. | 3.1 ± 1.2 |
